# Supplementary material for: Dualistic Thinking and Beliefs About the Treatability of Mental Illnesses Among Medical Students: Development and Validation of a New Questionnaire
Source: Research Square preprint supplement (doi:10.21203/rs.3.rs-7760915/v1), 2025-11-19
Supplement: Supplementary file 1 [file 4058e18bcf32aa11e9d14362.docx]

***Supplementary Material***

This file contains the German original version of the Dualism Questionnaire developed for this study.

***Dualismus Fragen:***

1 = Stimme voll zu, 2 = Stimme zu, 3 = Stimme eher zu, 4 = Stimme eher nicht zu, 5 = Stimme nicht zu, 6 = Stimme gar nicht zu.

1. Geist und Gehirn sind zwei voneinander getrennte Dinge.

2. Alle geistigen Prozesse sind reduzierbar auf Gehirnaktivität.

3. Alle Krankheiten entstehen durch Störungen von Körperfunktionen, die biochemisch oder physikalisch nachgewiesen werden können.

4. Der Mensch ist ein rein biologischer Organismus.

5. Der Mensch besitzt einen immateriellen Geist, der den Körper beseelt.

6. Die Gedanken, Persönlichkeit, Vorlieben und Entscheidungen einer Person sind alle ein Resultat von Vorgängen im Gehirn.

7. Ob eine Person gut oder schlecht ist, wird vollständig von Vorgängen im Gehirn bestimmt

8. In der Zukunft könnte man in der Lage sein, die Gedanken durch das Messen der Gehirnaktivität lesen zu können.

9. Der Geist ist nicht Teil des Gehirns, beeinflusst es aber.

10. Der Geist ist prinzipiell unabhängig vom Gehirn und nur vorübergehend mit diesem verbunden.

11. Der Geist ist eine immaterielle Substanz, die mit dem Gehirn zusammen wirkt um das Verhalten zu lenken.

12. Der Geist ist im Gehirn, aber nicht gleichzusetzen mit dem Gehirn.

13. Einige geistige Vorgänge sind unabhängig von Gehirnvorgängen.

14. Mein Bewusstsein besteht nach dem Tod meines physischen Körpers weiter.

15. In der Zukunft könnte man in der Lage sein, die Persönlichkeit eines Menschen durch das Auslesen der Gehirnaktivität zu bestimmen.

***Zum Schluss bitten wir Sie, noch drei Fragen zur Behandelbarkeit von psychischen Erkrankungen zu beantwortet***

(Auswahlmöglichkeiten: sehr gut, gut, befriedigend, ausreichend, mangelhaft, ungenügend)

***Wie gut schätzen sie die Behandelbarkeit folgender psychischer Erkrankung ein?***

1. Alkoholabhängigkeit

2. Paranoide Schizophrenie

3. Depression
