# Supplementary material for: Dualistic Thinking and Beliefs About the Treatability of Mental Illnesses Among Medical Students: Development and Validation of a New Questionnaire
Source: Research Square preprint supplement (doi:10.21203/rs.3.rs-7760915/v1), 2025-11-19
Supplement: Supplementary file 2 [file cec02f39edd09d44b6d54ed9.docx]

***Supplementary Material***

This file contains the English translation of the Dualism Questionnaire used in this study. The translation was reviewed by bilingual researchers for accuracy and clarity

***Dualism Questionnaire:***

1 = Strongly Agree, 2 = Agree, 3 = Somewhat Agree, 4 = Somewhat Disagree, 5 = Disagree, 6 = Strongly Disagree

1. Mind and brain are two separate entities.

2. All mental processes can be reduced to brain activity.

3. All illnesses arise from disturbances in bodily functions that can be detected biochemically or physically.

4. Humans are purely biological organisms.

5. Humans possess an immaterial mind that animates the body.

6. Thoughts, personality, preferences, and decisions are all results of brain processes.

7. Whether a person is good or bad is entirely determined by brain processes.

8. In the future, it may be possible to read thoughts by measuring brain activity.

9. The mind is not part of the brain, but it influences it.

10. The mind is fundamentally independent of the brain and only temporarily connected to it.

11. The mind is an immaterial substance that interacts with the brain to direct behavior.

12. The mind is in the brain but is not the same as the brain.

13. Some mental processes are independent of brain processes.

14. My consciousness continues after the death of my physical body.

15. In the future, it may be possible to determine a person's personality by reading brain activity.

**Finally, we ask you to answer three questions regarding the treatability of mental illnesses** (Options: Very Good, Good, Satisfactory, Adequate, Poor, Very Poor):

How would you rate the treatability of the following mental conditions?

1. alcohol dependency
2. paranoid schizophrenia
3. depression
